# Supplementary material for: Synthesis, structure and magnetic properties of multipod-shaped cobalt ferrite nanocrystals
Source: Royal Society of Chemistry journal article supplement (doi:10.1039/c9nj02237f), 2019-01-01

# Synthesis, Structure and Magnetic Properties of Multipod –shaped Cobalt Ferrite Nanocrystals

*Mohammed Hennous,<sup>a</sup> E. Venkata Ramana,<sup>b</sup> David M. Tobaldi,<sup>c</sup> Benilde F. O. Costa,<sup>d</sup> M. A. Valente,<sup>b</sup> Joao Labrincha<sup>c</sup> and Mohamed Karmaoui<sup>a,c e\*</sup>*

<sup>a</sup> *Laboratoire de physico-chimie des matériaux, catalyse et environnement  
Département de Génie Chimique, Faculté de Chimie, Université des Sciences et  
de la Technologie d'Oran-Mohamed Boudiaf, BP 1505 El M'naouer Oran,  
31000, Algérie*

<sup>b</sup> *I3N-Aveiro, Department of Physics, University of Aveiro, Campus Universitário  
de Santiago, 3810-193 Aveiro, Portugal*

<sup>c</sup> *Department of Materials and Ceramic Engineering/CICECO – Aveiro Institute  
of Materials, University of Aveiro, Campus Universitário de Santiago, 3810-193  
Aveiro, Portugal*

<sup>d</sup> *CFisUC, Physics Department, University of Coimbra, 3004-516 Coimbra,  
Portugal*

## AUTHOR INFORMATION

### Corresponding Author

\*E-mail :

\*E-mail : [Mohamed.karmaoui@univ-usto.dz](mailto:Mohamed.karmaoui@univ-usto.dz)

## Electronic Supporting Information (ESI):

Figure S1. (a) Overview HR-TEM image of an assembly of  $\text{CoFe}_2\text{O}_4$ , (b) bi-, tri-, tetra, hexapod, (c) assembly of tetrapods and (d) individual tetrapod.

Figure S1.

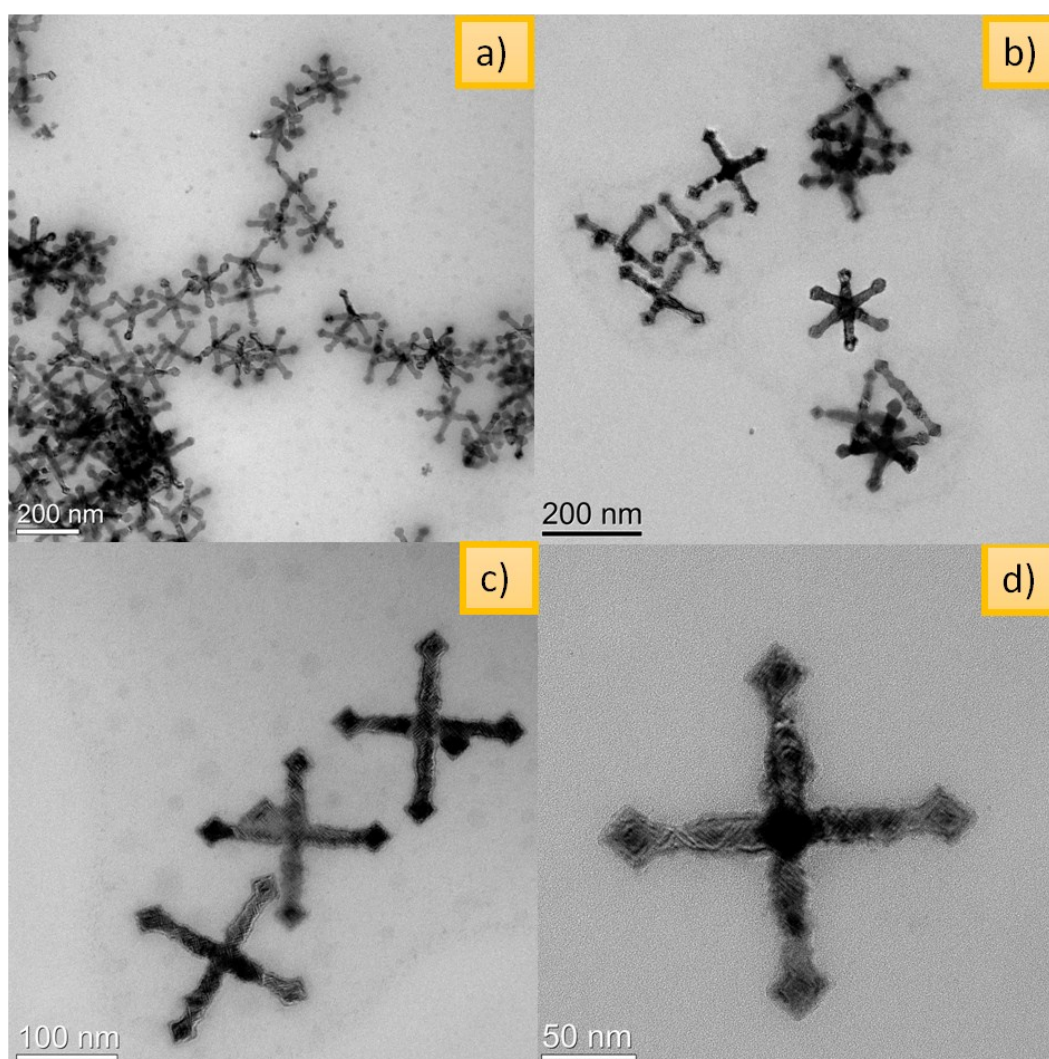

Supplement: c9nj02237f1.pdf [file c9nj02237f1.pdf]
